# Supplementary material
Source: PubMed Central journal article supplement (PMC7185459)
Supplement: mmc1.pdf [file mmc1.pdf]

**Evans et al. Table S1. Commercial Analogs of SRI 29365**

| <b>Structures</b>                                                                   | <b>ID</b>            | <b>Supplier</b> | <b>EC50</b> | <b>CC50</b> | <b>SI50</b> |
|-------------------------------------------------------------------------------------|----------------------|-----------------|-------------|-------------|-------------|
| 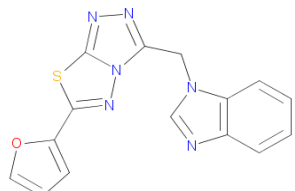   | 7962703<br>SRI 29365 | ChemBridge      | 0.7         | 55.3        | 83.8        |
|    | 7963817              | ChemBridge      | 4.1         | >100        | >24.4       |
|    | 7951242              | ChemBridge      | 1.6         | 64.9        | 40.6        |
|  | 7952897              | ChemBridge      | 22.4        | >100        | >4.5        |
|  | 7957456              | ChemBridge      | >100        | >100        | 1.0         |
|  | 7959537              | ChemBridge      | >100        | 100.0       | 1.0         |

|                                                                                     |         |            |      |      |     |
|-------------------------------------------------------------------------------------|---------|------------|------|------|-----|
| 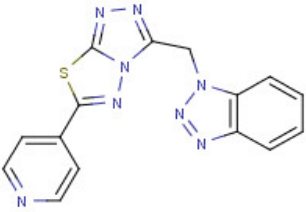   | 7957171 | ChemBridge | >100 | >100 | 1.0 |
|    | 7959559 | ChemBridge | >100 | 96.0 | 1.0 |
|    | 7950290 | ChemBridge | >100 | >100 | 1.0 |
|   | 9058548 | ChemBridge | >100 | 57.7 | <1  |
|  | 9058560 | ChemBridge | >100 | 71.9 | <1  |
|  | 7950781 | ChemBridge | >100 | 12.7 | <1  |

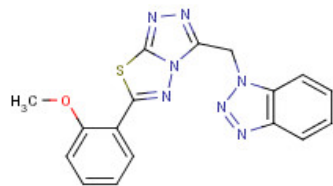

7958570 ChemBridge >100 30.6 <1

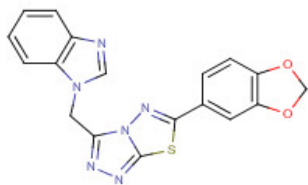

9005346 ChemBridge >100 100.0 >1

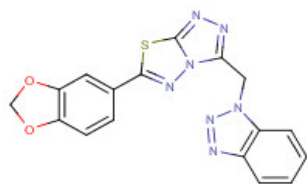

9007351 ChemBridge >100 100.0 1.0

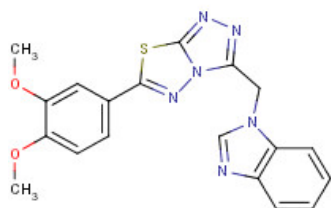

7950520 ChemBridge >100 >100 1.0

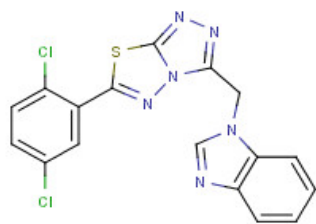

7954246 ChemBridge >100 95.1 <1

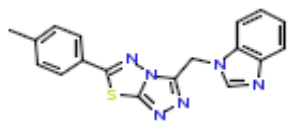

9268036 ChemBridge >100 >100 1.0

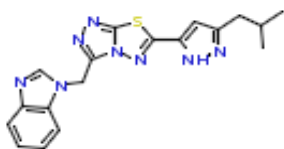

FOCK6S-384|InterBioScreen >100 >100 1.0

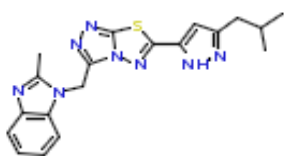

FOCK6S-339|InterBioScreen >100 18.4 <1

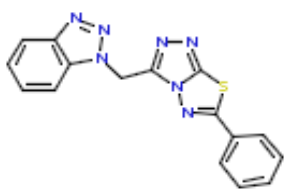

STK824322 VitasMLab 1.8 52.0 28.9

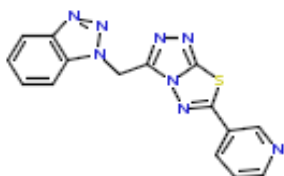

STK506606 VitasMLab >100 >100 1.0

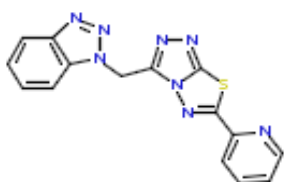

STK500073 VitasMLab 31.3 100.0 3.2

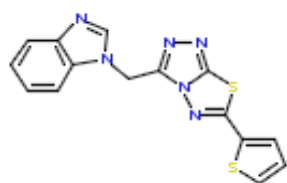

STK824319 VitasMLab 0.2 90.1 391.7

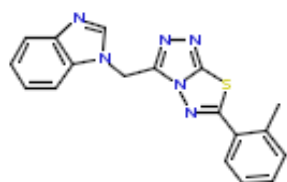

STK506581 VitasMLab 9.7 17.6 1.8

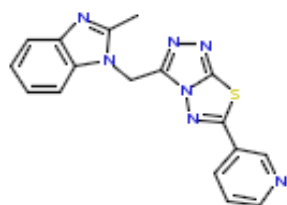

STK318490 VitasMLab >100 60.7 <1

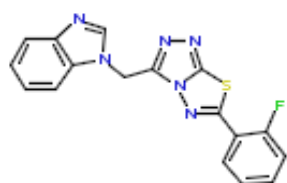

STK824310 VitasMLab 1.0 20.5 20.5

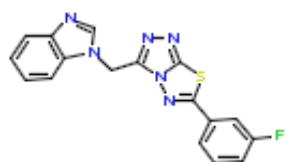

STK824311 VitasMLab 0.9 30.0 34.1

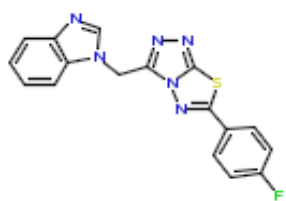

STK824312 VitasMLab 8.1 26.8 3.3

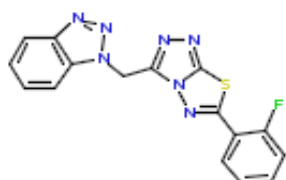

STK506594 VitasMLab 7.5 100.0 13.3

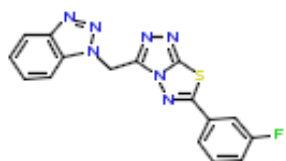

STK824325 VitasMLab 8.5 100.0 11.8

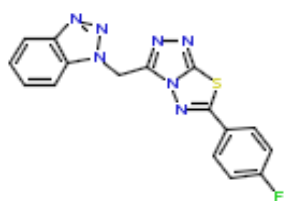

STK824326 VitasMLab >100 >100 1.0

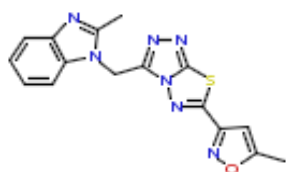

STK708701 VitasMLab >100 59.0 <1

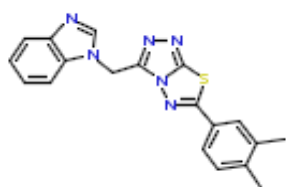

STL099067 VitasMLab >100 89.6 <1

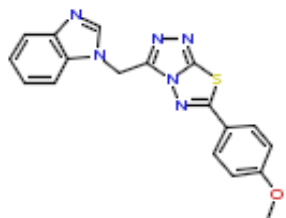

STK824315 VitasMLab >100 35.5 <1

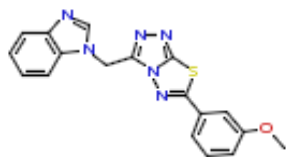

STK824314 VitasMLab >100 11.1 <1

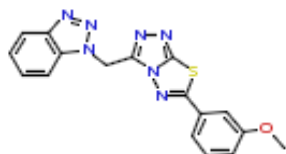

STK824328 VitasMLab >100 >100 1.0

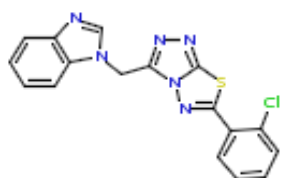

STK506584 VitasMLab 11.1 27.0 2.4

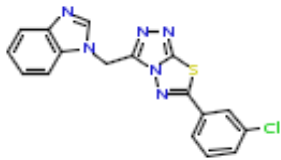

STK506585 VitasMLab 3.4 45.0 13.2

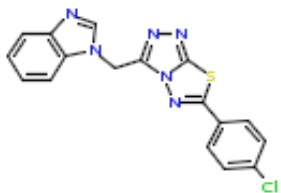

STK824309 VitasMLab >100 >100 1.0

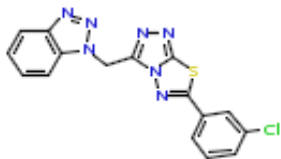

STK824324 VitasMLab >100 >100 1.0

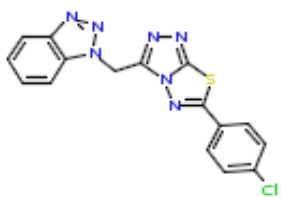

STK506593 VitasMLab 27.2 52.4 1.9

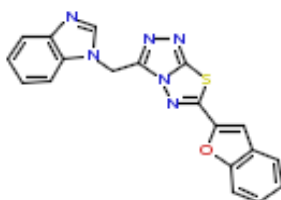

STK205192 VitasMLab >100 >100 1.0



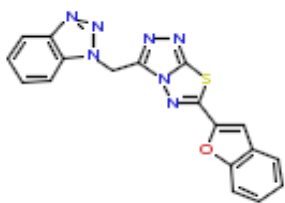

STK506603 VitasMLab >100 >100 1.0

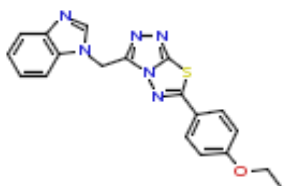

STK506586 VitasMLab >100 100.0 1.0

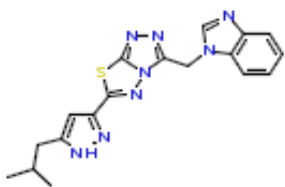

STK624368 VitasMLab >100 >100 1.0

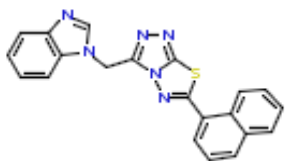

STK824321 VitasMLab >100 >100 1.0

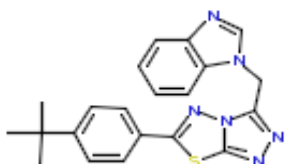

STK205190 VitasMLab >100 26.8 <1

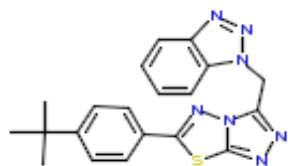

STK824323 VitasMLab >100 34.0 <1

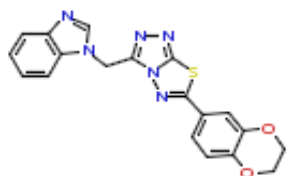

STK500067 VitasMLab >100 12.6 <1

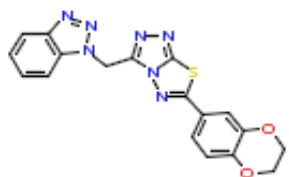

STK506604 VitasMLab >100 >100 1.0

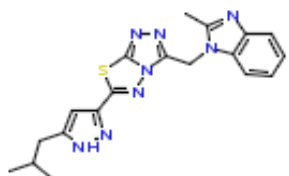

STK629571 VitasMLab >100 43.2 <1

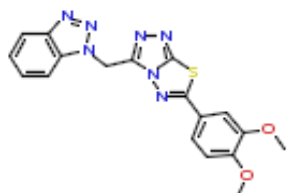

STK824329 VitasMLab >100 >100 1.0

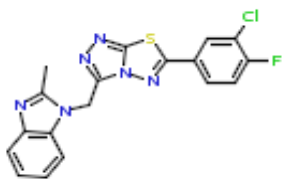

STK625382 VitasMLab >100 7.4 <1

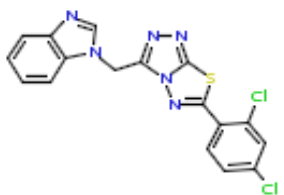

STK500059 VitasMLab >100 83.3 <1

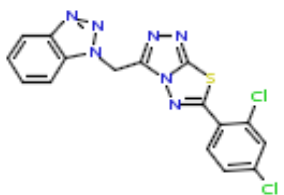

STK708137 VitasMLab >100 >100 1.0

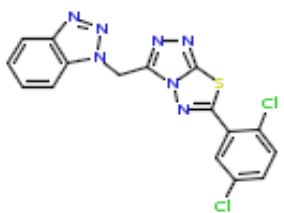

STK824327 VitasMLab >100 >100 1.0

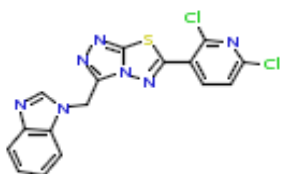

STK640316 VitasMLab >100 19.2 <1

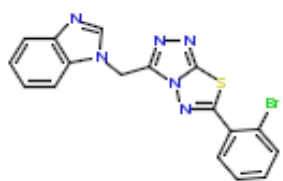

STK506582 VitasMLab >100 23.1 <1

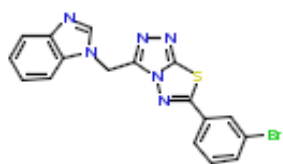

STK500058 VitasMLab 8.6 >100 >11,6

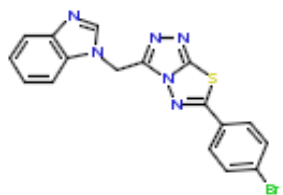

STK506583 VitasMLab >100 >100 1.0

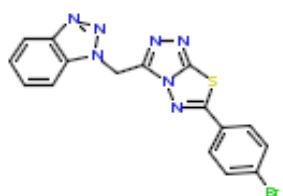

STK883830 VitasMLab >100 >100 1.0

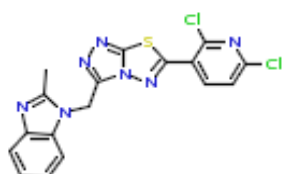

STK631506 VitasMLab >100 >100 1.0

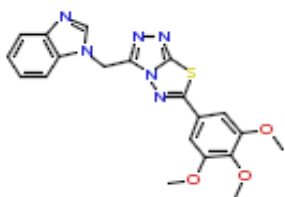

STK883826 VitasMLab >100 >100 1.0

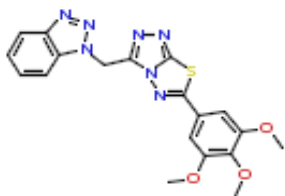

STK506595 VitasMLab >100 >100 1.0

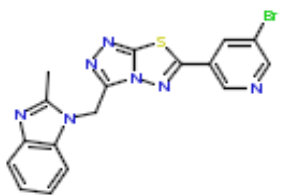

STK626441 VitasMLab >100 40.0 <1

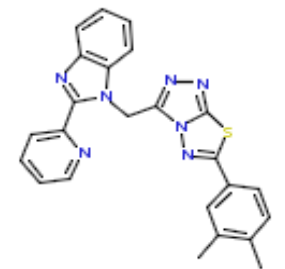

STK353657 VitasMLab >100 >100 1.0

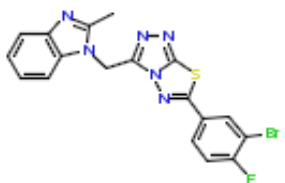

STK946299 VitasMLab >100 9.7 <1

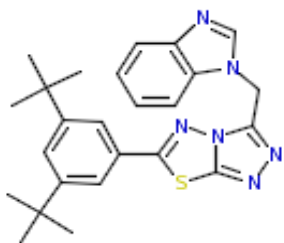

STK500057 VitasMLab >100 1.3 <1

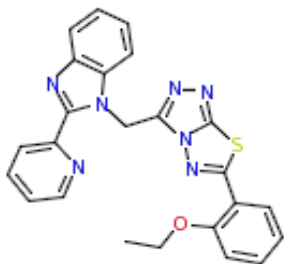

STK353658 VitasMLab >100 1.3 <1

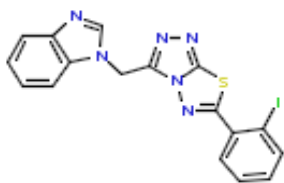

STL099068 VitasMLab >100 55.9 <1

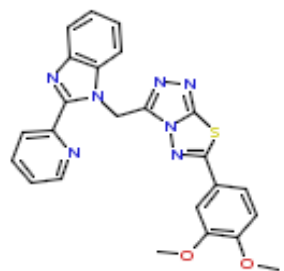

STK500094 VitasMLab >100 >100 1.0
